# Supplementary material for: The Impact of Hypoxic Hepatitis on Clinical Outcomes after Extracorporeal Cardiopulmonary Resuscitation
Source: PubMed Central journal article supplement (PMC7565649; doi:10.3390/jcm9092994), 2020-09-16
Supplement: jcm-09-02994-s001.pdf [file jcm-09-02994-s001.pdf]

**Table S1.** Results of the liver tests according to the time of ECPR.

|                        | <b>HH (n=90)</b>                      |                                        |                                         |                                         |
|------------------------|---------------------------------------|----------------------------------------|-----------------------------------------|-----------------------------------------|
|                        | <b>Baseline</b>                       | <b>Day 0</b>                           | <b>Day 1</b>                            | <b>Day 2</b>                            |
| AST, U/L               | 31.0 (20.0–70.0) ( <i>n</i> = 57)     | 147.0 (67.0–394.0) ( <i>n</i> = 89)    | 322.5 (139.3–757.8) ( <i>n</i> = 78)    | 215.5 (91.0–464.0) ( <i>n</i> = 69)     |
| ALT, U/L               | 24.0 (16.0–48.0) ( <i>n</i> = 57)     | 82.0 (37.0–227.0) ( <i>n</i> = 89)     | 116.0 (53.0–282.8) ( <i>n</i> = 78)     | 93.5 (44.8–245.8) ( <i>n</i> = 69)      |
| ALP, U/L               | 76.5 (58.0–102.8) ( <i>n</i> = 54)    | 71.0 (50.8–103.3) ( <i>n</i> = 81)     | 54.0 (42.0–77.0) ( <i>n</i> = 73)       | 55.0 (42.5–72.5) ( <i>n</i> = 66)       |
| LDH, IU/L              | 928.0 (641.5–1499.5) ( <i>n</i> = 78) | 1446.0 (920.0–2612.5) ( <i>n</i> = 25) | 1851.0 (1147.5–3437.5) ( <i>n</i> = 32) | 2187.0 (1549.3–4036.5) ( <i>n</i> = 12) |
| INR                    | 1.08 (1.0–1.3) ( <i>n</i> = 39)       | 1.9 (1.4–2.9) ( <i>n</i> = 84)         | 1.6 (1.3–2.1) ( <i>n</i> = 75)          | 1.4 (1.2–1.7) ( <i>n</i> = 69)          |
| Total bilirubin, mg/dL | 0.7 (0.5–1.2) ( <i>n</i> = 57)        | 1.0 (0.6–1.6) ( <i>n</i> = 89)         | 1.5 (1–2.5) ( <i>n</i> = 77)            | 1.7 (1.0–2.8) ( <i>n</i> = 68)          |
| Albumin, g/dL          | 3.9 (3.5–4.3) ( <i>n</i> = 56)        | 2.7 (2–3.4) ( <i>n</i> = 86)           | 2.8 (2.4–3.2) ( <i>n</i> = 76)          | 2.9 (2.6–3.1) ( <i>n</i> = 63)          |

Numbers are median (interquartile range); AST, aspartate aminotransferase; ALT, alanine aminotransferase; ALP, alkaline phosphatase; LDH, lactate dehydrogenase; INR, international normalized ratio.

**Table S2.** Incidences of complications associated with ECMO.

|                               | <b>HH (n = 90)</b> | <b>Non-HH (n = 275)</b> | <b><i>p</i> Value</b> |
|-------------------------------|--------------------|-------------------------|-----------------------|
| Composite of complications    | 55                 | 89                      | <0.001                |
| Limb ischemia                 | 10                 | 18                      | 0.158                 |
| Groin hematoma                | 6                  | 16                      | 0.769                 |
| ECMO site bleeding            | 13                 | 23                      | 0.093                 |
| Gastrointestinal bleeding     | 8                  | 14                      | 0.189                 |
| Stroke                        | 6                  | 6                       | 0.038                 |
| Sepsis                        | 6                  | 5                       | 0.020                 |
| ECMO insertion site infection | 3                  | 1                       | 0.019                 |
| Rhabdomyolysis                | 3                  | 6                       | 0.541                 |
| In hospital mortality         | 65                 | 151                     | 0.004                 |
